# Supplementary material
Source: Springer Nature journal article supplement (https://www.springermedizin.de/resource/supplementary/12967_2011_830_MOESM2_ESM.pdf/9577144)

% patients without amputation

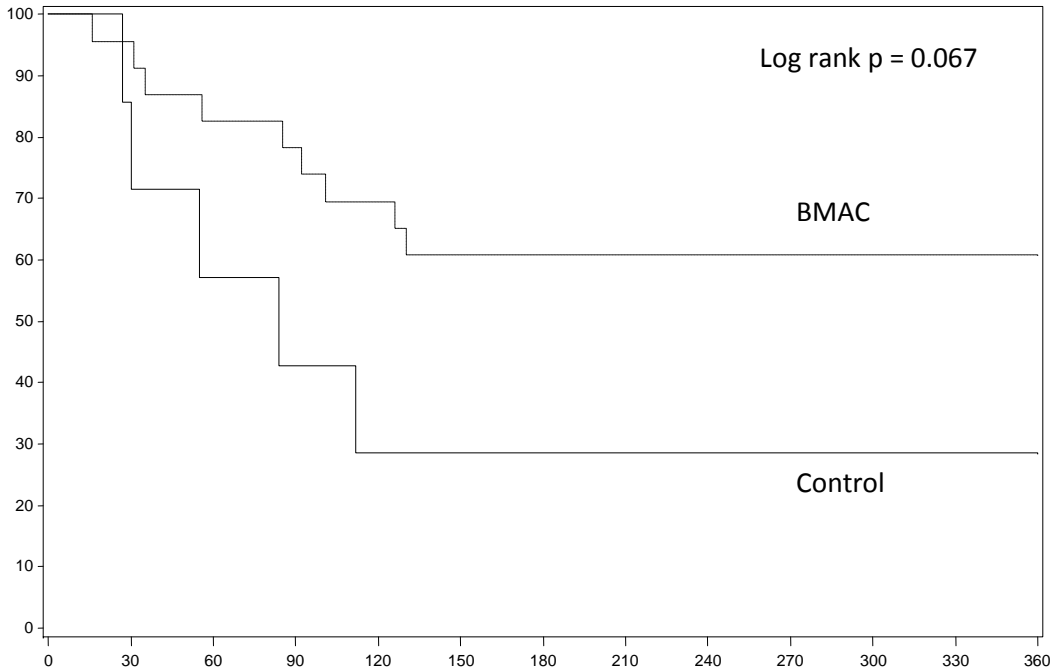

Time to Amputation over 1 Yr, BMAC vs. Control (Days)

— Placebo — BMAC

Supplement: MOESM2 [file 9577144]
